# Supplementary material for: High entropy stabilizing lattice oxygen participation of Ru- based oxides in acidic water oxidation
Source: Royal Society of Chemistry journal article supplement (doi:10.1039/d2ta06128g), 2022-01-01
Supplement: d2ta06128g1.pdf [file d2ta06128g1.pdf]

1 *Supporting Information for*

2 High entropy stabilizing lattice oxygen participation of Ru-based  
3 oxides in acidic water oxidation

4 Yaodong Yu,<sup>a</sup> Hongdong Li,<sup>a</sup> Jiao Liu,<sup>a</sup> Wenxia Xu,<sup>a</sup> Dan Zhang,<sup>b</sup> Juan Xiong,<sup>a</sup> Bin Li,<sup>c</sup> A.O. Omelchuk,<sup>d</sup>  
5 Jianping Lai<sup>\*a</sup> and Lei Wang<sup>\*a,b</sup>

6 <sup>a</sup> State Key Laboratory Base of Eco-Chemical Engineering, International Science and Technology  
7 Cooperation Base of Eco-chemical Engineering and Green Manufacturing, College of Chemistry and  
8 Molecular Engineering, Qingdao University of Science and Technology, Qingdao 266042, P. R. China

9 <sup>b</sup> Shandong Engineering Research Center for Marine Environment Corrosion and Safety Protection, College  
10 of Environment and Safety Engineering, Qingdao University of Science and Technology, Qingdao 266042,  
11 P. R. China

12 <sup>c</sup> College of Materials Science and Engineering, Qingdao University of Science and Technology, Qingdao  
13 266061, P. R. China

14 <sup>d</sup> V.I. Vernadskii Institute of General and Inorganic Chemistry of the Ukrainian NAS, prospekt Palladina  
15 32/34, 03680 Kyiv, Ukraine

16  
17 **Chemicals:** Molybdenumhexacarbonyl (Mo(CO)<sub>6</sub>, 98%) and Nickel (II) acetylacetonate (Ni(acac)<sub>2</sub>, 95%)  
18 were bought from Sigma-Aldrich. Chromium(III) acetylacetonate (Cr(acac)<sub>3</sub>, 97%), Iron (III) 2,4-  
19 pentanedionate (Fe(acac)<sub>3</sub>), Nafion solution (5 wt.%) were supplied by Alfa Aesar. Triruthenium

1 dodecacarbonyl ( $\text{Ru}_3(\text{CO})_{12}$ , 98%) was purchased from Aladdin. Carbon nanotube, multi-walled (MWCNT)  
2 was bought from Aladdin.

3 **Preparation of  $\text{RuNiMoCrFeO}_x/\text{CNT}$ .** First, 8.0 mg  $\text{Ru}_3(\text{CO})_{12}$ , 3.3 mg  $\text{Ni}(\text{acac})_2$ , 3.3 mg  $\text{Mo}(\text{CO})_6$ , 4.4  
4 mg  $\text{Fe}(\text{acac})_3$ , 2.8 mg  $\text{Cr}(\text{acac})_3$  and 9.0 mg of processed MWCNT were mixed and ground in a mortar for  
5 10 minutes to mix evenly. The mixture was then placed in a 10 mL quartz bottle and heated in a household  
6 microwave oven at 1000 W starting at room temperature for 120 seconds. The black pellet product was  
7 collected by centrifugation and washed three times with ethanol. Finally, the black pellet product was dried  
8 in an oven at  $60^\circ\text{C}$  for 6 hours for further use.

9 **Preparation of  $\text{RuNiMoCrO}_x/\text{CNT}$ .** First, 8.0 mg  $\text{Ru}_3(\text{CO})_{12}$ , 3.3 mg  $\text{Ni}(\text{acac})_2$ , 3.3 mg  $\text{Mo}(\text{CO})_6$ , 2.8 mg  
10  $\text{Cr}(\text{acac})_3$  and 8.0 mg of processed MWCNT were mixed and ground in a mortar for 10 minutes to mix  
11 evenly. Other treatments are the same as  $\text{RuNiMoCrFeO}_x/\text{CNT}$ .

12 **Preparation of  $\text{RuMoCrFeO}_x/\text{CNT}$ .** First, 8.0 mg  $\text{Ru}_3(\text{CO})_{12}$ , 3.3 mg  $\text{Mo}(\text{CO})_6$ , 4.4 mg  $\text{Fe}(\text{acac})_3$ , 2.8 mg  
13  $\text{Cr}(\text{acac})_3$  and 8.0 mg of processed MWCNT were mixed and ground in a mortar for 10 minutes to mix  
14 evenly. Other treatments are the same as  $\text{RuNiMoCrFeO}_x/\text{CNT}$ .

15 **Preparation of  $\text{RuNiMoO}_x/\text{CNT}$ .** First, 8.0 mg  $\text{Ru}_3(\text{CO})_{12}$ , 3.3 mg  $\text{Ni}(\text{acac})_2$ , 3.3 mg  $\text{Mo}(\text{CO})_6$  and 7.0 mg  
16 of processed MWCNT were mixed and ground in a mortar for 10 minutes to mix evenly. Other treatments  
17 are the same as  $\text{RuNiMoCrFeO}_x/\text{CNT}$ .

18 **Preparation of  $\text{RuNiCrO}_x/\text{CNT}$ .** First, 8.0 mg  $\text{Ru}_3(\text{CO})_{12}$ , 3.3 mg  $\text{Ni}(\text{acac})_2$ , 2.8 mg  $\text{Cr}(\text{CO})_6$  and 6.0 mg

1 of processed MWCNT were mixed and ground in a mortar for 10 minutes to mix evenly. Other treatments  
2 are the same as RuNiMoCrFeO<sub>x</sub>/CNT.

3 **Preparation of RuO<sub>2</sub>/CNT.** First, 8.0 mg Ru<sub>3</sub>(CO)<sub>12</sub> and 5.0 mg of processed MWCNT were mixed and  
4 ground in a mortar for 10 minutes to mix evenly. Other treatments are the same as RuNiMoCrFeO<sub>x</sub>/CNT.

5 **Physical and electrochemical characterizations.** To study the morphology and structure of the catalyst, a  
6 scanning electron microscope (SEM) was tested on Hitachi S-4800 instrument. The transmission electron  
7 microscope (TEM) and high resolution TEM (HRTEM) of the catalyst were tested using FEI Tecnai-G2 F30  
8 at an accelerating voltage of 300 KV, and the structure of the catalyst was further characterized. Powder X-  
9 ray diffraction (XRD) spectrum recording was performed on an X'Pert-PRO MPD diffractometer, which  
10 was run with Cu K $\alpha$  radiation at 40 KV and 40 mA. X-ray photoelectron spectroscopy (XPS) analysis was  
11 performed with an Axis Supra spectrometer using a monochromatic Al K $\alpha$  source at 15 mA and 14 kV. Scan  
12 analysis with an analysis area of 300 $\times$ 700 microns and a pass energy of 100 eV. The spectrum was calibrated  
13 by carbon 1s spectrum, and its main line was set to 284.8 eV, and then the valence state of the catalyst was  
14 analyzed using Casa XPS software. The catalyst that has been tested for stability is scraped from the working  
15 electrode by ultrasonic treatment and collected for the next step of SEM, TEM and XRD characterization.

16 Disperse 1 mg of the catalyst in 1 mL of a mixed solution of ethanol + ultrapure water + 5% Nafion (v: v:  
17 v=1:1:0.05), after sonication for 0.5 h, the different catalysts with the concentration of 1 mg mL<sup>-1</sup> was  
18 obtained. Electrochemical measurements were carried out in a conventional three-electrode battery of a  
19 CHI760E Electrochemical Workstation (Shanghai Chenhua Instrument Corporation, China). A graphite rod

1 electrode was used as the counter electrode, and the reference electrode was a silver chloride electrodes  
2 (Ag/AgCl). A glassy carbon electrode (GCE, diameter: 3 mm, area: 0.07065 cm<sup>2</sup>) was used as the working  
3 electrode. Take 10μL of the mixed slurry and drop it evenly on the surface of the GCE. After it is naturally  
4 dried, further electrochemical tests are performed. All potentials reported in this work are corrected using  
5 reversible hydrogen electrodes (RHE). In a 0.5 M H<sub>2</sub>SO<sub>4</sub> solution saturated with N<sub>2</sub>, linear sweep  
6 voltammetry (LSV) was used to test and evaluate the OER performance of the catalyst at a sweep rate of 5  
7 mV s<sup>-1</sup>. All polarization curves were corrected for 95% iR. The durability test was performed in 0.5 M H<sub>2</sub>SO<sub>4</sub>  
8 solution using chronoamperometry. In addition, the LSV after 10,000 cycles of CV was measured to further  
9 evaluate the stability of the catalyst. Electrochemical impedance spectroscopy (EIS) measurement was  
10 performed at a frequency of 0.1 Hz to 100 kHz in a 0.5 M H<sub>2</sub>SO<sub>4</sub> solution saturated with N<sub>2</sub>.

11 **Calculation of turnover frequency (TOF).** Owing to the bulk nature of the catalysts, we selected an  
12 electrochemical method to obtain the TOF values of each sample. Nearly all the surface active sites were  
13 assumed to be accessible by the electrolyte, and then the TOF values could be calculated by the following  
14 equation:

$$15 \quad TOF = \frac{I}{2FQ}$$

16 where I, n, and F are the current during linear sweep measurement, the number of active site number, and  
17 the Faraday constant, respectively. The factor 1/2 is because water electrolysis requires two electrons to  
18 evolve one hydrogen molecule from two protons. The values (n) were calculated from the CV data in the  
19 potential range from -0.2 V to +0.6 V vs RHE in 1 M phosphate buffer (pH=7.4) at a scan rate of 50 mV/s.

1 Since it is very difficult to assign the observed peaks to a given redox couple, the surface active sites are  
2 nearly in linear relationship with the integrated voltammetric charges (cathodic and anodic) over the CV  
3 curves. Assuming a one-electron process for both reduction and oxidation, we can evaluate the upper limit  
4 of the active site number according to the follow formula:

$$5 \quad n = \frac{Q_{cv}}{2F}$$

6 where the Q represent the whole charge of CV curve.

7 **Electrochemical *in situ* FTIR test.** The intermediate products during the OER process were detected by in  
8 situ FTIR through Thermo iS50 FTIR with a liquid-nitrogen-cooled MCT-A detector. The in situ FTIR  
9 curves were collected by the method of internal reflection. Firstly, the catalysts modified silicon crystal  
10 plated with gold was used as working electrode, Ag/AgCl and Pt wire were worked as reference electrode  
11 and counter electrode respectively. All the tests were conducted in N<sub>2</sub> saturated 0.5 M H<sub>2</sub>SO<sub>4</sub>. The applied  
12 potential was stepped positively from 0.8 V to 1.8 V (vs. RHE) with an interval of 200 mV. Secondly, the  
13 results of in situ FTIR were reported as relative change in absorbance:  $\Delta R/R = (R(ES) - R(ER))/R(ER)$ . The  
14 R(ES) and R(ER) are the spectra collected at the applied potential and reference potential.

15 ***In situ* Differential electrochemical mass spectrometry (DEMS) measurement.** We applied the Faraday  
16 scan analysis of DEMS. A mass spectrum is a two-dimensional representation of ions with the measured m/z  
17 on the x-axis and the abundance on the y-axis. First, in order to exclude the influence of impurity gases in  
18 the air, the gas bag was partially filled with air and then introduced into the capillary tube for mass  
19 spectrometric analysis tests (Figure S26a), and then the bag was removed to pass Ar for 20 minutes to exhaust

1 the air (Figure S26b), and the gas after OER was introduced into the same gas bag collected for analysis to  
2 detect the production of isotopic oxygen (Figure 4c).

3 **The configuration entropy ( $S_{\text{config}}$ ).** The configurational entropy was calculated using the following  
4 formula.

$$5 \quad S_{\text{config}} = -R \left[ \left( \sum_{i=1}^N x_i \ln x_i \right)_{\text{cation-site}} + \left( \sum_{j=1}^N x_j \ln x_j \right)_{\text{anion-site}} \right]$$

6 where  $x_i$  and  $x_j$  represent the mole fractions of ions present in the cation- and anion-site, respectively, and R  
7 is the ideal gas constant (8.314 J mol<sup>-1</sup> K<sup>-1</sup>).

8 Example for HEOs with equimolar amount of different cations (5 cations  $\rightarrow x_j = 0.2$ )

$$9 \quad S_{\text{config}} = -R (((0.2 \ln 0.2) + (0.2 \ln 0.2) + (0.2 \ln 0.2) + (0.2 \ln 0.2) + (0.2 \ln 0.2))_{\text{cation-site}} + (1 \ln 1)_{\text{anion-site}})$$

$$10 \quad S_{\text{config}} = -R (5 * (0.2 \ln 0.2)) = 1.61R$$

11 Similarly, the entropy values of the quaternary and ternary compounds can be calculated.

12

1 **Figures**

2

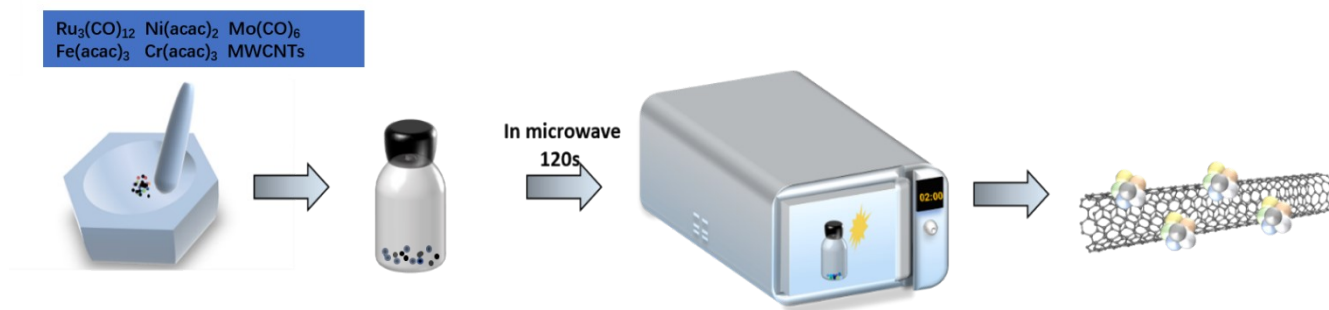

3

4 **Figure S1.** Schematic diagram illustrating the synthetic procedure of  $\text{RuNiMoCrFeO}_x/\text{CNT}$ .

5

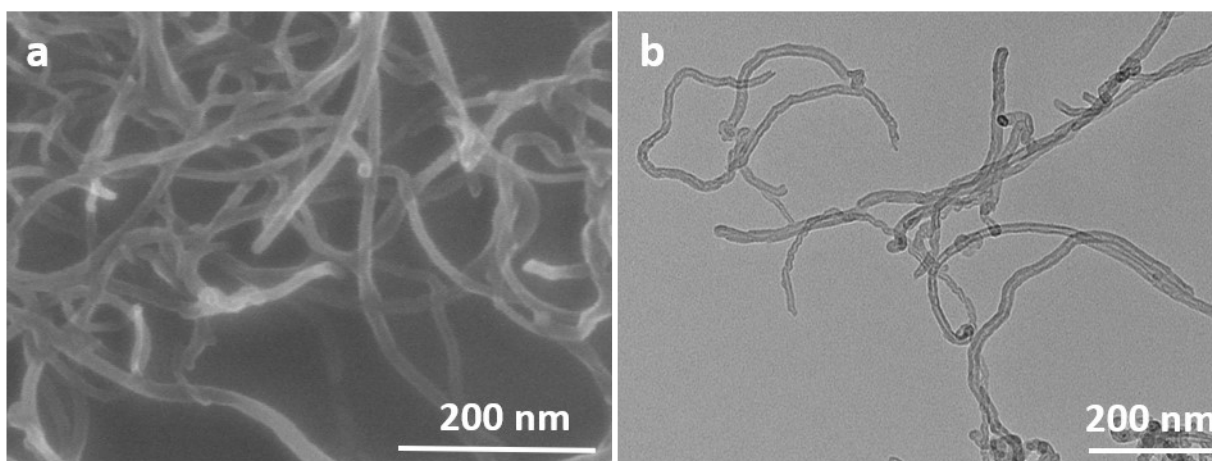

6

7

8 **Figure S2.** (a) SEM image of MWCNT. (b) TEM image of MWCNT.

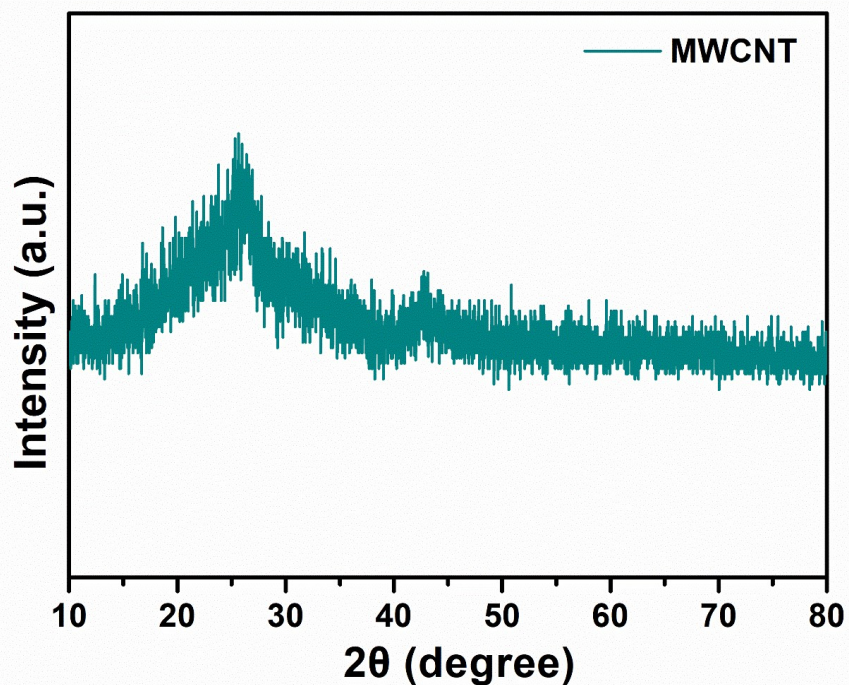

Figure S3. XRD image of MWCNT.

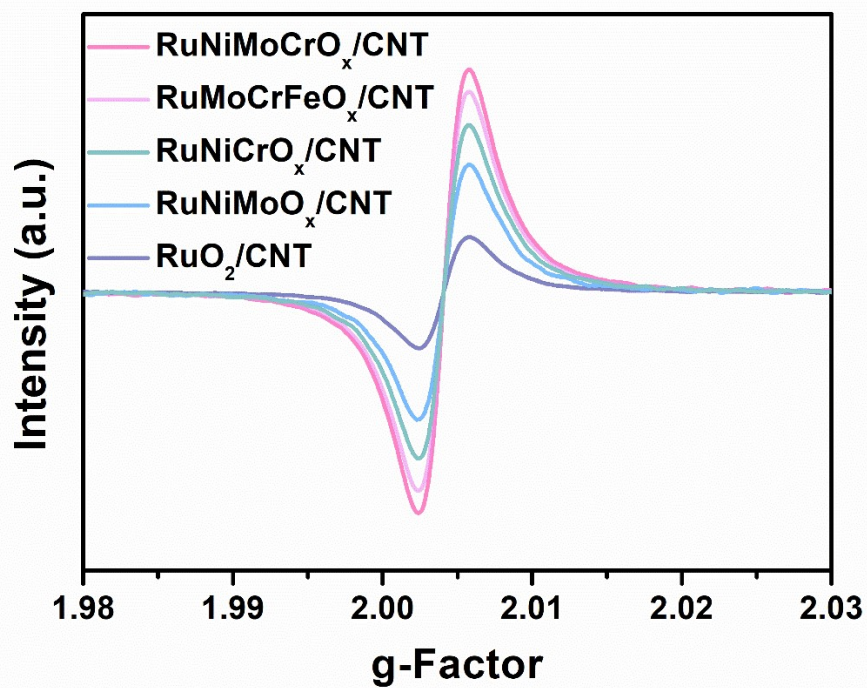

Figure S4. The ESR spectra for RuNiMoCrO<sub>x</sub>/CNT, RuMoCrFeO<sub>x</sub>/CNT, RuNiCrO<sub>x</sub>/CNT, RuNiMoO<sub>x</sub>/CNT and RuO<sub>2</sub>/CNT.



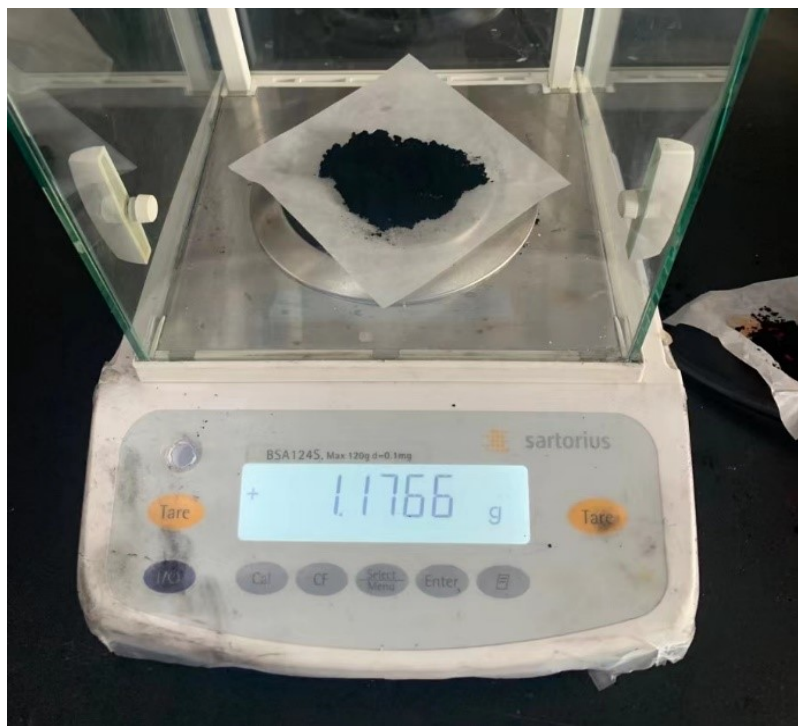

1  
2  
3  
4

Figure S5. Image of the product after large-scale synthesis of catalyst.

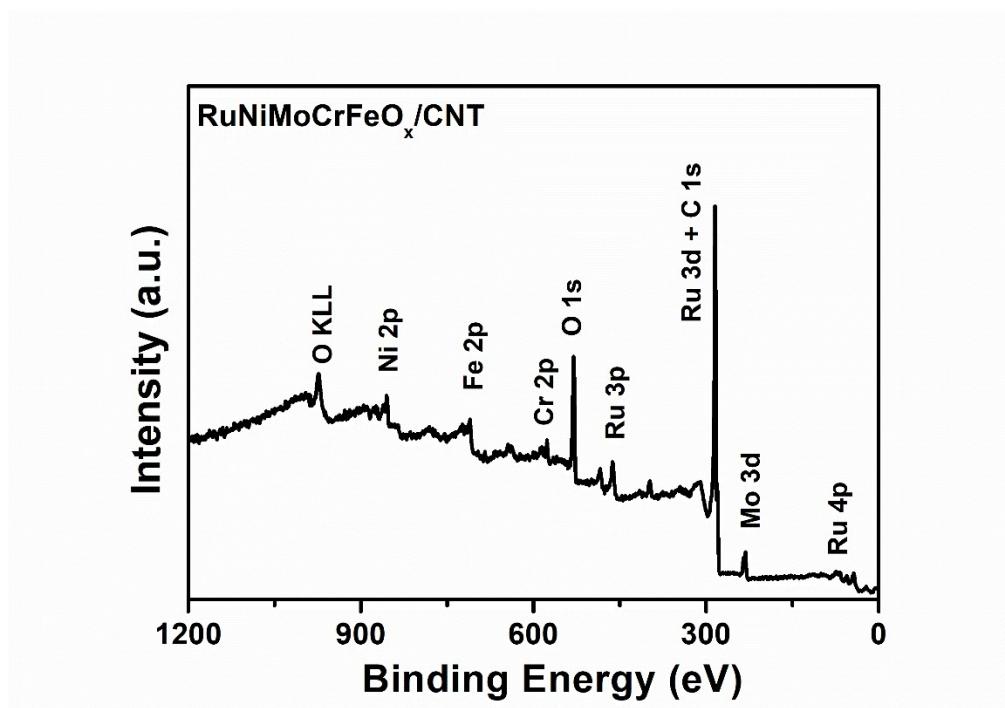

5  
6  
7

Figure S6. XPS spectra of RuNiMoCrFeO<sub>x</sub>/CNT.

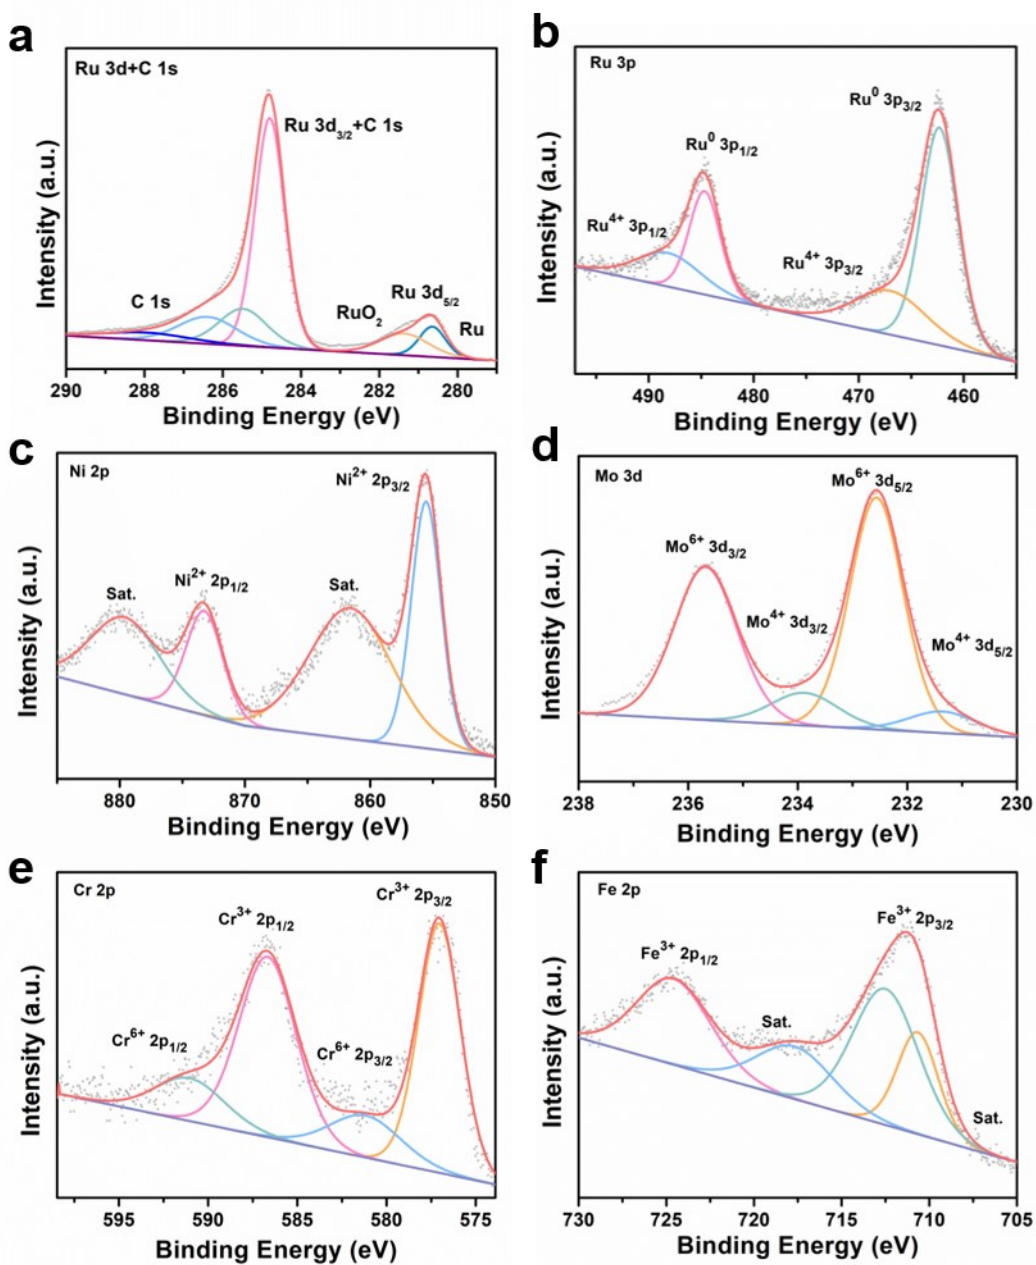

1  
2  
3 **Figure S7.** XPS spectra of RuNiMoCrFeO<sub>x</sub>/CNT. (a) XPS spectra of Ru 3d+C 1s. (b-f) XPS spectra of Ru  
4 3p (b) Ni 2p (c) Mo 3d (d) Cr 2p (e) and Fe 2p (f) in RuNiMoCrFeO<sub>x</sub>/CNT.  
5

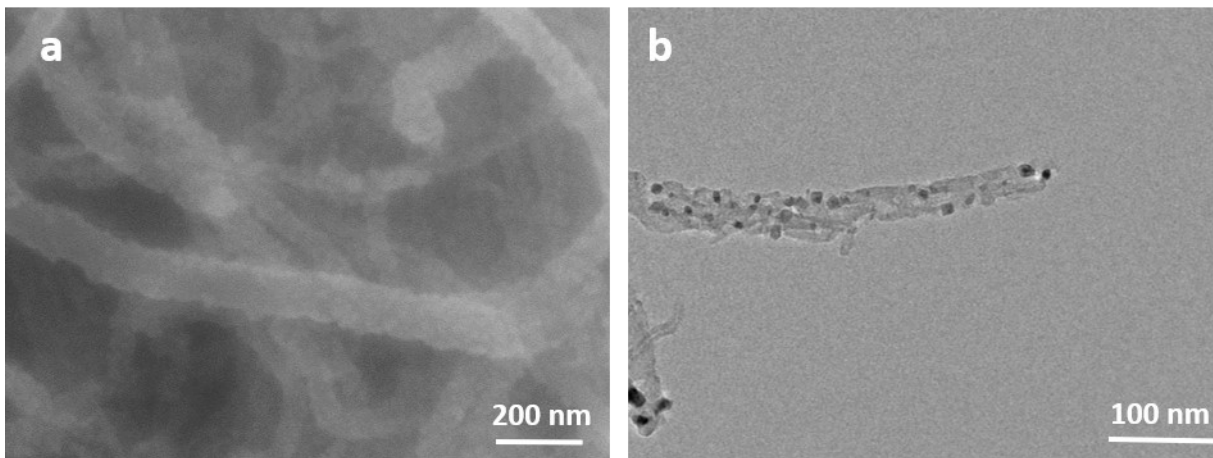

**Figure S8.** (a) SEM and (b) TEM images of RuO<sub>2</sub>/CNT.

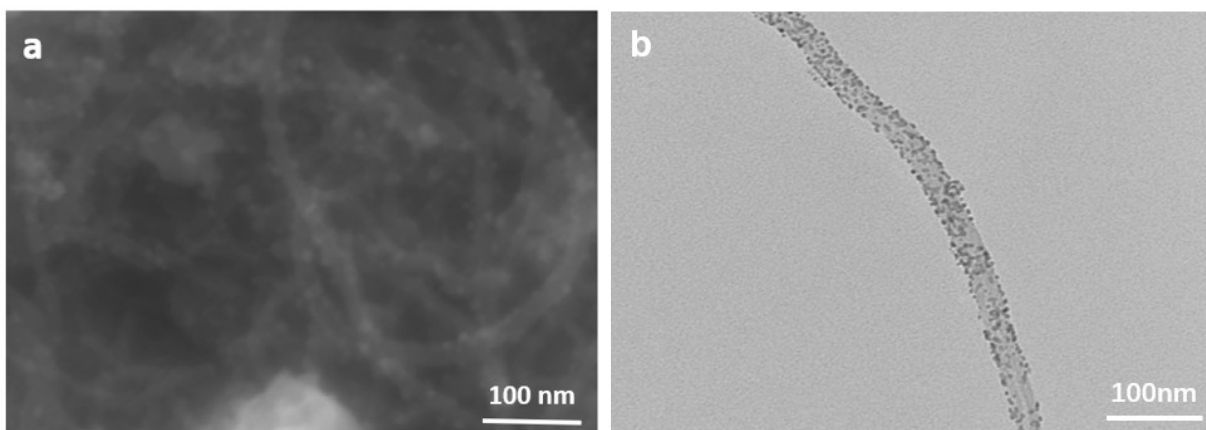

**Figure S9.** (a) SEM and (b) TEM images of RuNiMoCrO<sub>x</sub>/CNT.

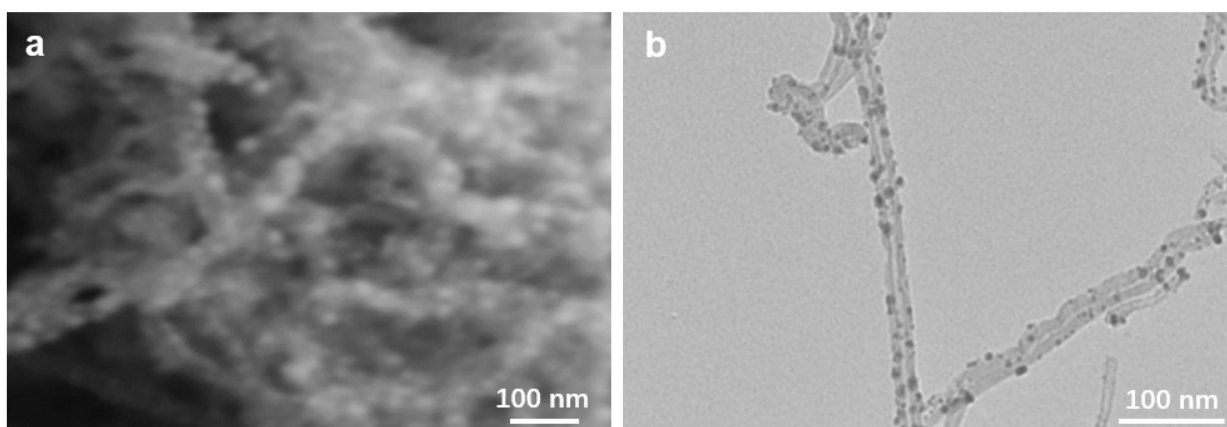

**Figure S10.** (a) SEM and (b) TEM images of RuMoCrFeO<sub>x</sub>/CNT.

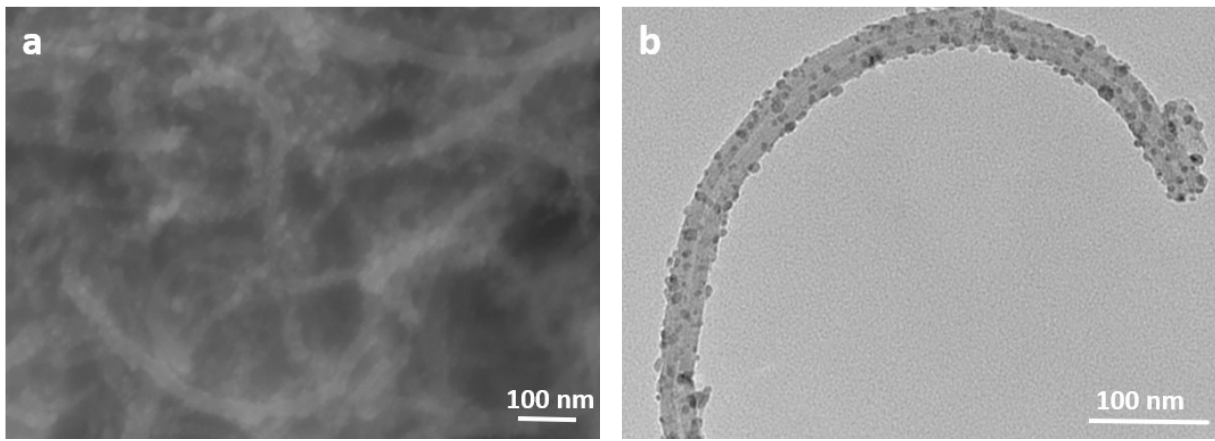

**Figure S11.** (a) SEM and (b) TEM images of RuNiMoO<sub>x</sub>/CNT.

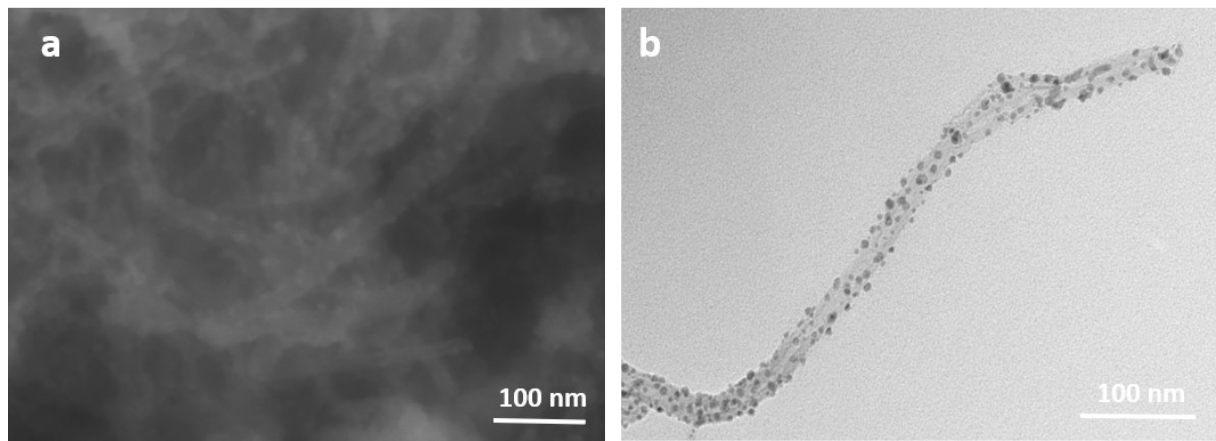

**Figure S12.** (a) SEM and (b) TEM images of RuNiCrO<sub>x</sub>/CNT.

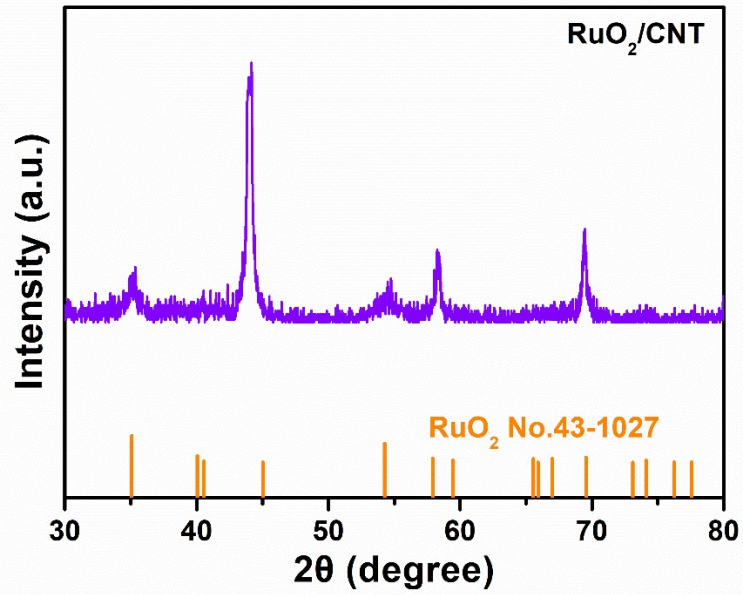

Figure S13. XRD image of RuO<sub>2</sub>/CNT.

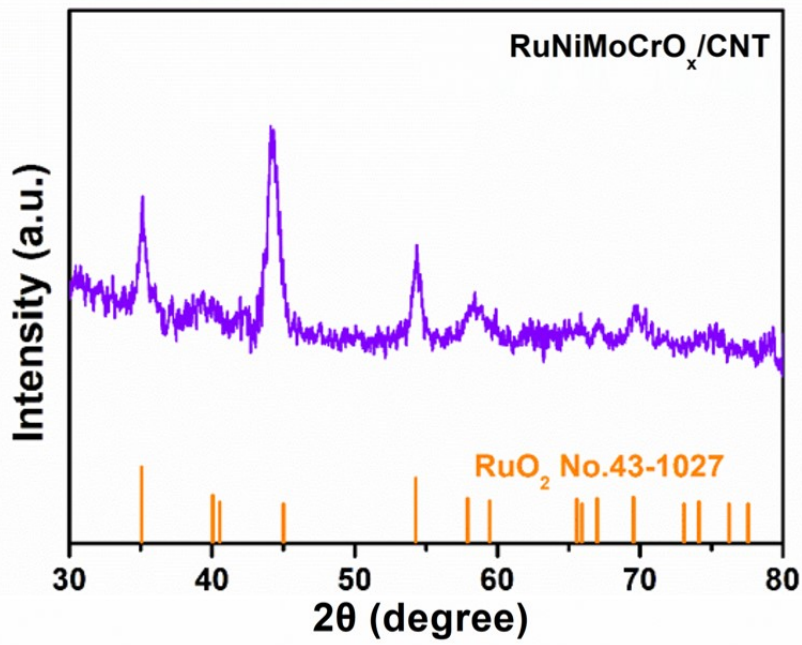

Figure S14. XRD image of RuNiMoCrO<sub>x</sub>/CNT.

1  
2  
3  
4

5  
6  
7  
8

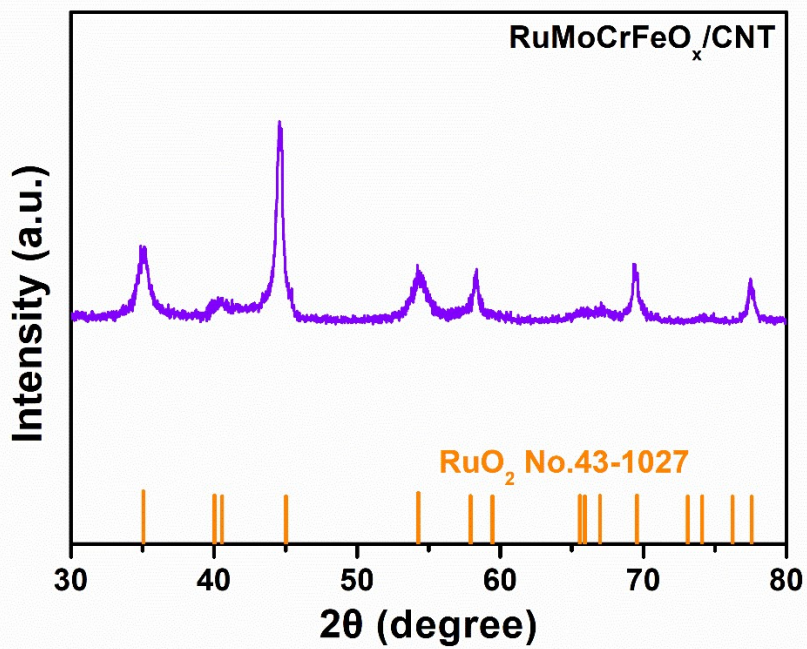

Figure S15. XRD image of RuMoCrFeO<sub>x</sub>/CNT.

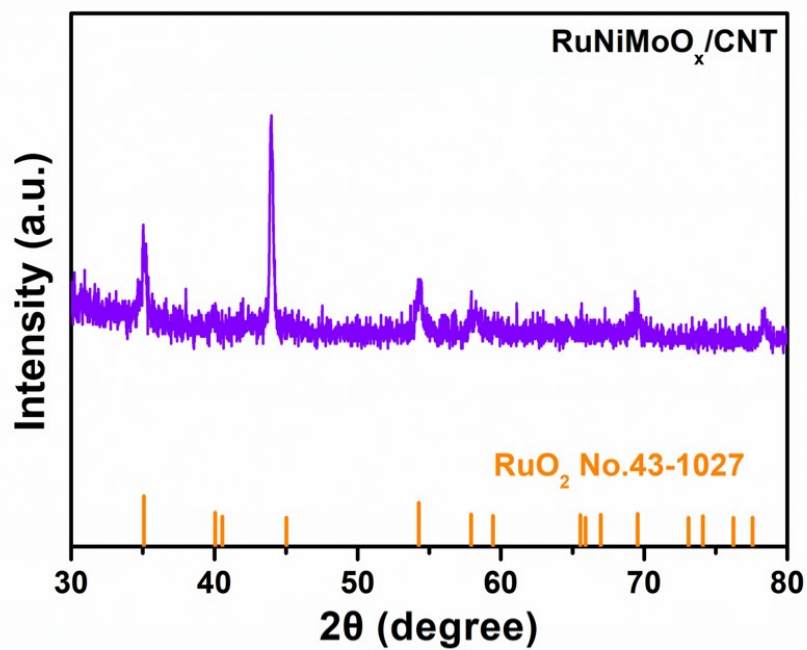

Figure S16. XRD image of RuNiMoO<sub>x</sub>/CNT.

1  
2  
3  
4

5  
6  
7  
8

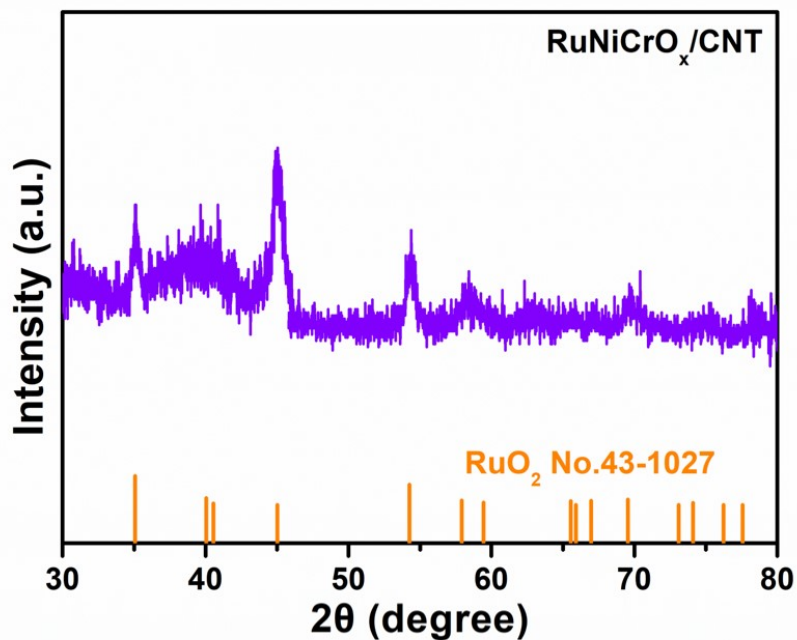

Figure S17. XRD image of RuNiCrO<sub>x</sub>/CNT.

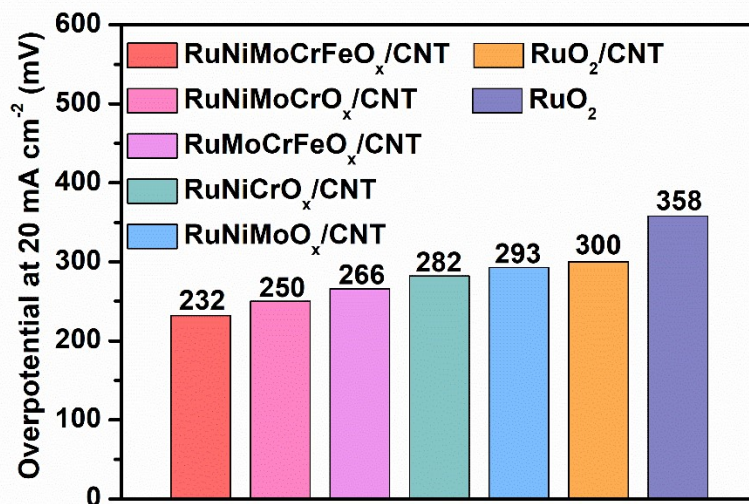

Figure S18. Comparison of overpotential at 20 mA cm<sup>-2</sup> of RuNiMoCrFeO<sub>x</sub>/CNT, RuNiMoCrO<sub>x</sub>/CNT, RuMoCrFeO<sub>x</sub>/CNT, RuNiCrO<sub>x</sub>/CNT, RuNiMoO<sub>x</sub>/CNT, RuO<sub>2</sub>/CNT, commercial RuO<sub>2</sub> catalysts.

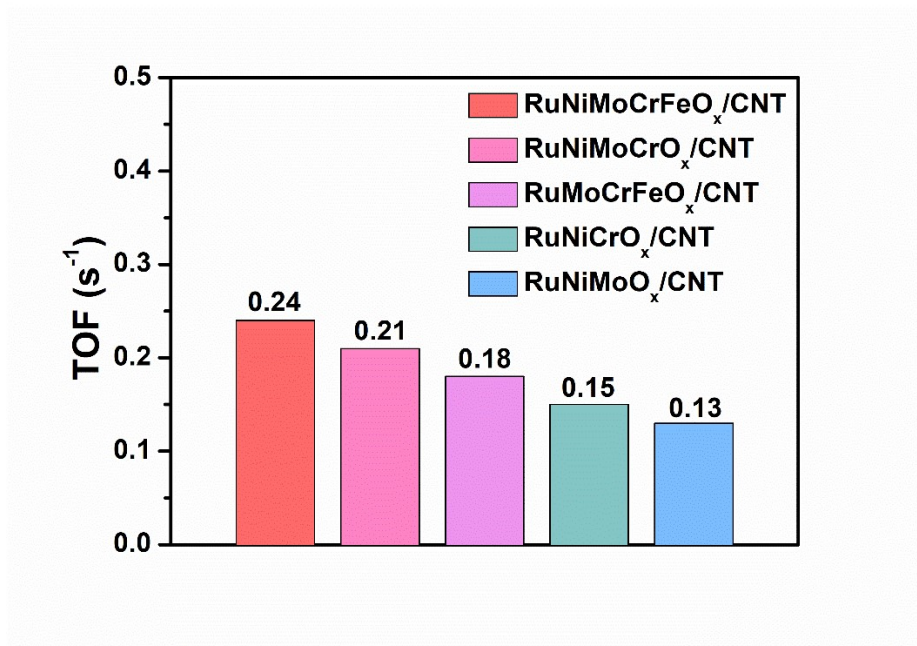

1  
 2  
 3 **Figure S19.** TOF values of RuNiMoCrFeO<sub>x</sub>/CNT, RuNiMoCrO<sub>x</sub>/CNT, RuMoCrFeO<sub>x</sub>/CNT,  
 4 RuNiCrO<sub>x</sub>/CNT, RuNiMoO<sub>x</sub>/CNT at the overpotential of 250 mV.  
 5

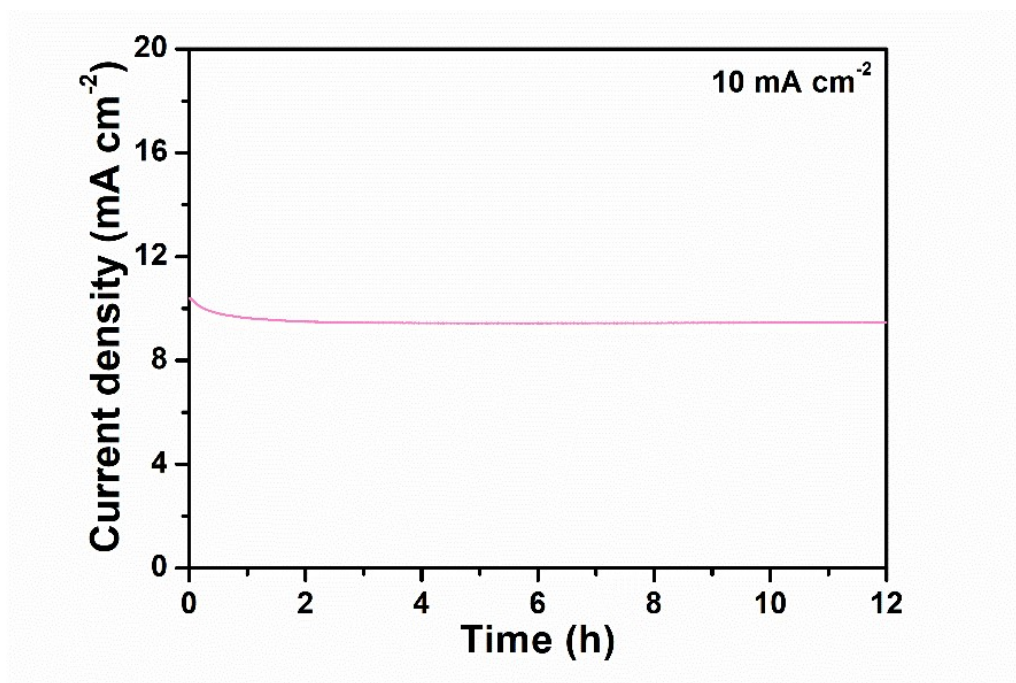

6  
 7  
 8 **Figure S20.** Chronoamperometric measurement curves of RuNiMoCrFeO<sub>x</sub>/CNT catalyst for OER.  
 9



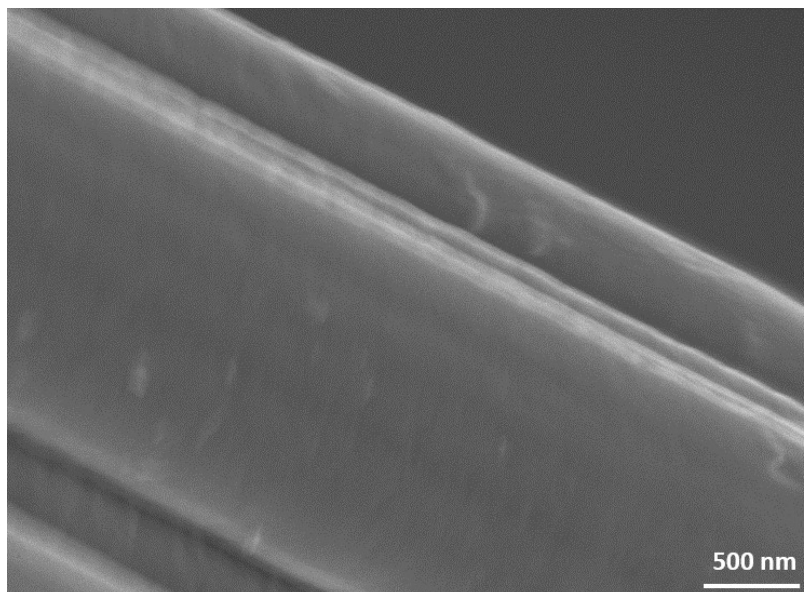

1  
2  
3

Figure S21. SEM image of pure CC.

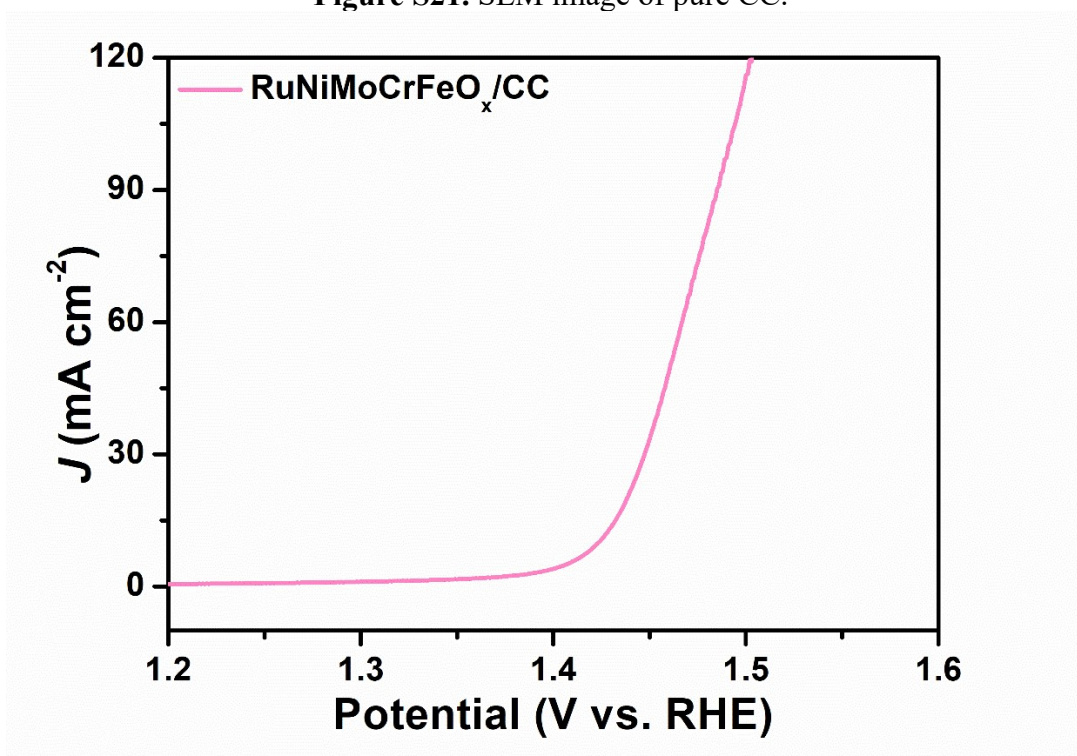

4  
5  
6  
7

Figure S22. OER polarization curves of RuNiMoCrFeO<sub>x</sub>/CC in 0.5 M H<sub>2</sub>SO<sub>4</sub>.

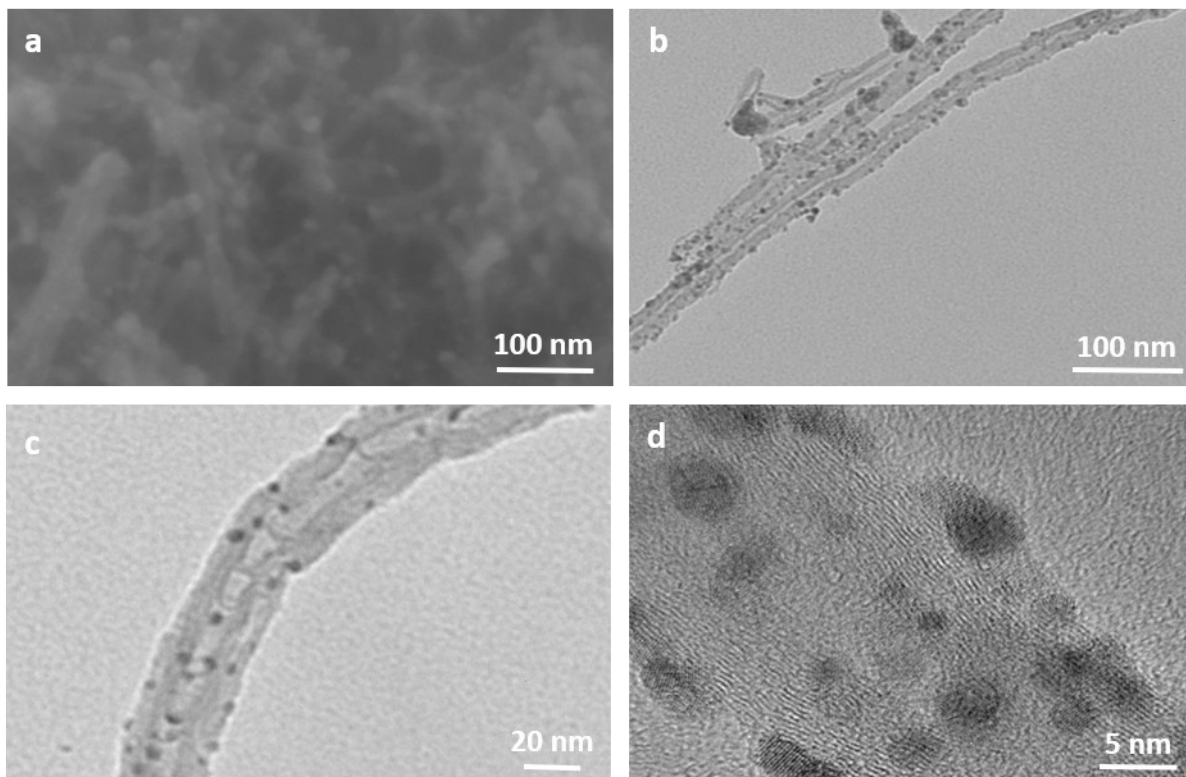

**Figure S23.** (a) SEM, (b, c) TEM and (d) HRTEM images of RuNiMoCrFeO<sub>x</sub>/CNT after OER.

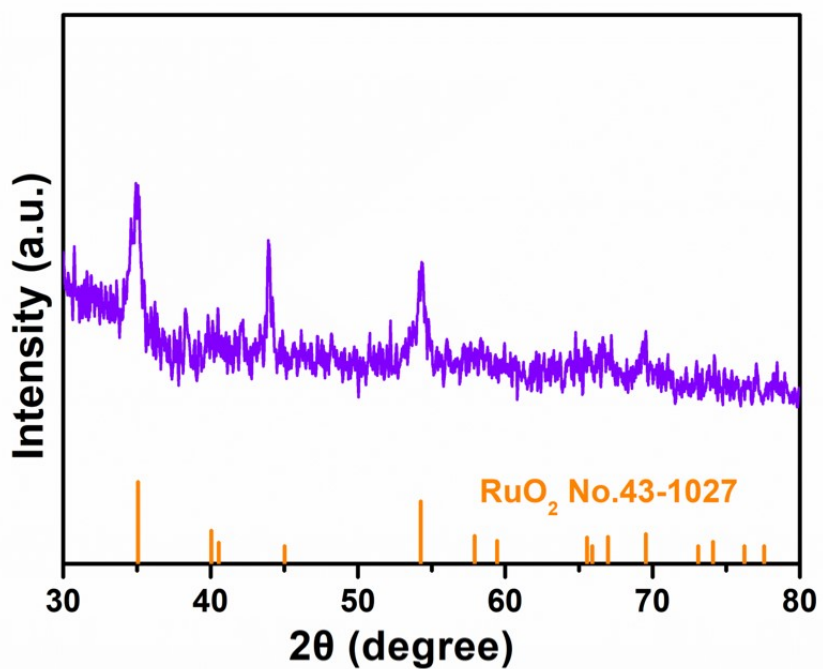

**Figure S24.** XRD image of RuNiMoCrFeO<sub>x</sub>/CNT after OER.

1  
2  
3  
4

5  
6  
7

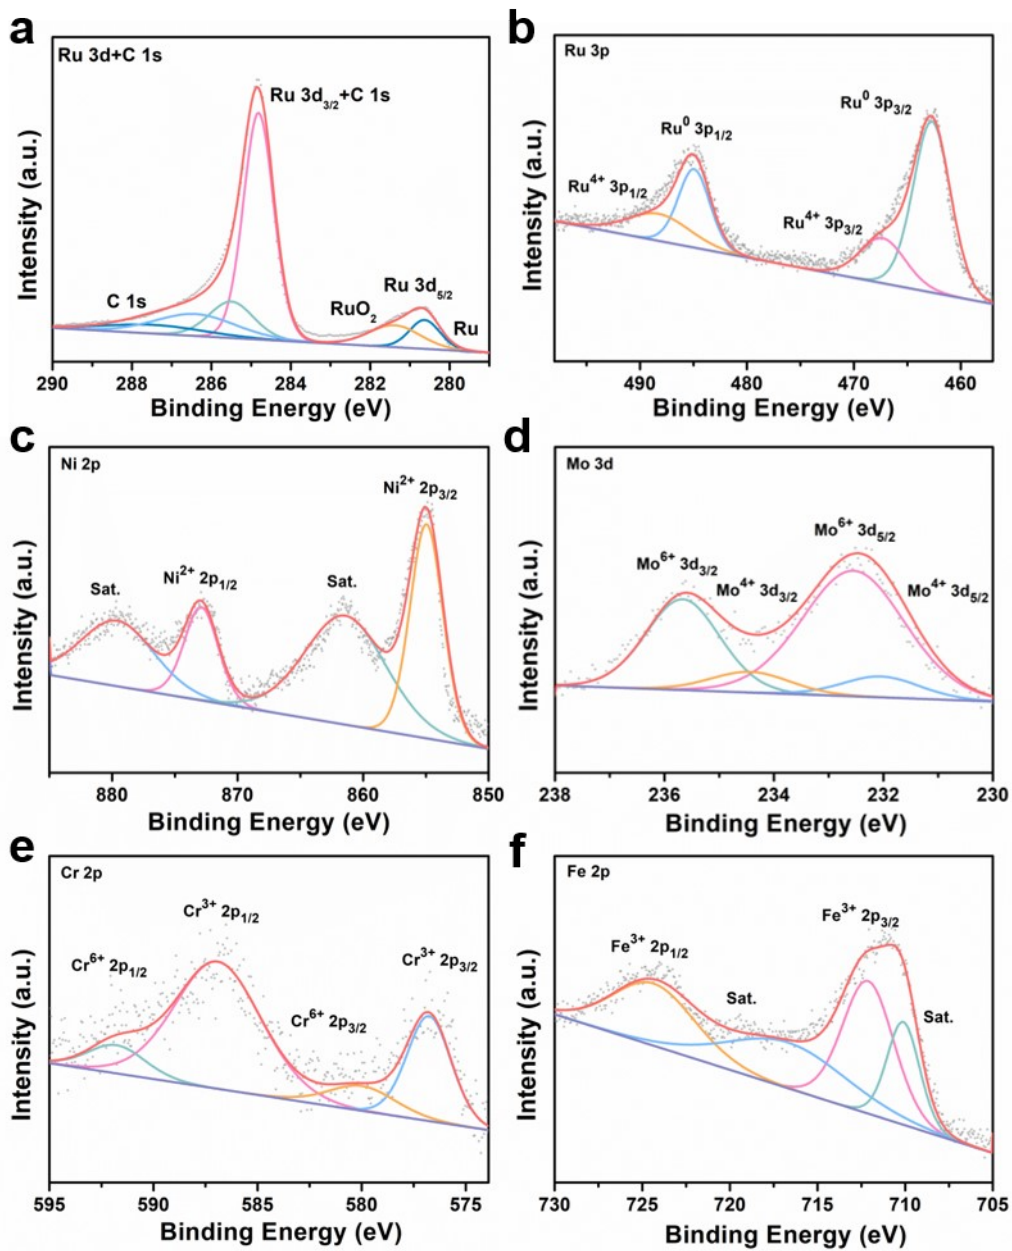

1  
2  
3 **Figure S25.** XPS spectra of RuNiMoCrFeO<sub>x</sub>/CNT after OER. (a) XPS spectra of C 1s. (b–f) XPS spectra of  
4 Ru 3p (b), Ni 2p (c), Mo 3d (d), Cr 2p (e), and Fe 2p (f) in RuNiMoCrFeO<sub>x</sub>/CNT.

5  
6

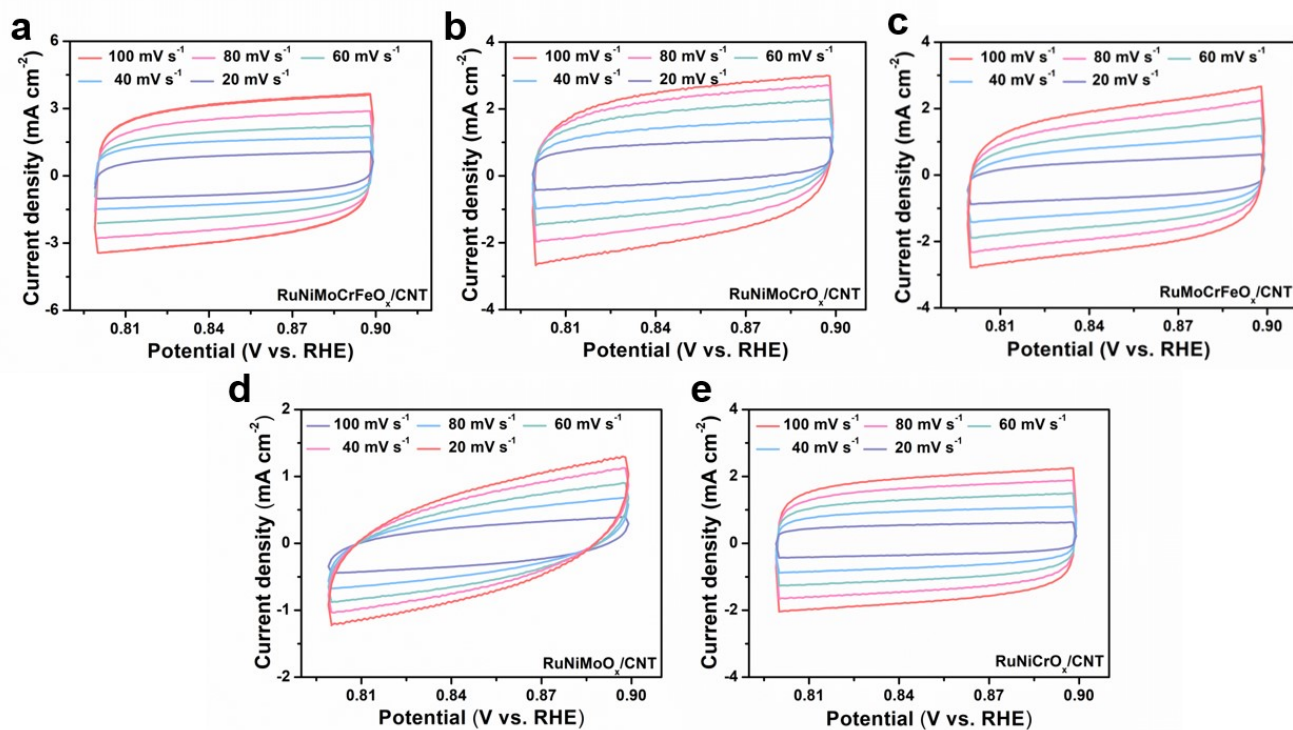

1  
 2  
 3 **Figure S26.** CV curves measured at different scan rates from 20 to 100  $\text{mV s}^{-1}$  in 0.5 M  $\text{H}_2\text{SO}_4$  for  
 4  $\text{RuNiMoCrFeO}_x/\text{CNT}$  (a),  $\text{RuNiMoCrO}_x/\text{CNT}$  (b),  $\text{RuMoCrFeO}_x/\text{CNT}$  (c),  $\text{RuNiMoO}_x/\text{CNT}$  (d),  
 5  $\text{RuNiCrO}_x/\text{CNT}$  (e).

6  
 7  
 8

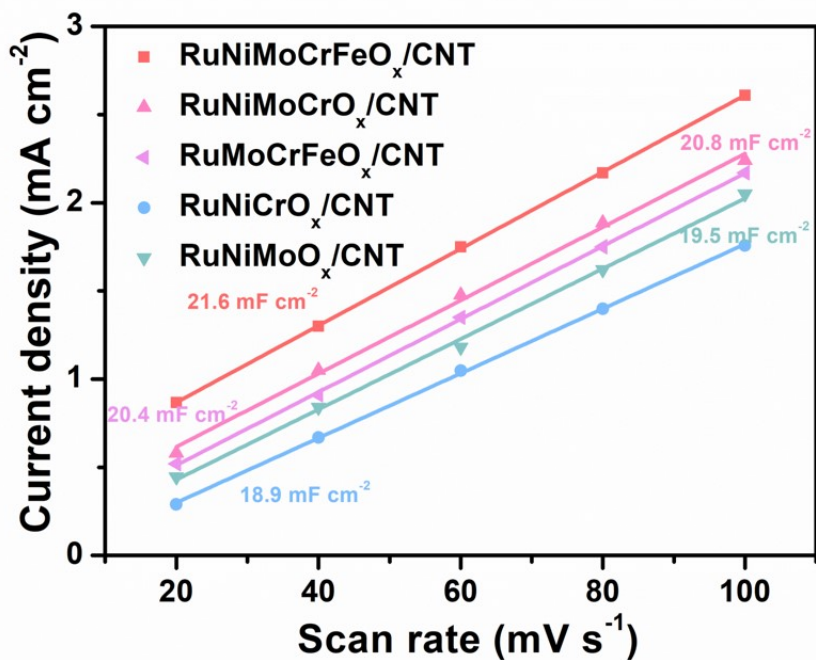

1  
 2 **Figure S27.** Capacitive current at middle potential of CV curves as function of scan rates for  
 3 RuNiMoCrFeO<sub>x</sub>/CNT, RuNiMoCrO<sub>x</sub>/CNT, RuMoCrFeO<sub>x</sub>/CNT, RuNiMoO<sub>x</sub>/CNT, RuNiCrO<sub>x</sub>/CNT  
 4 catalysts.

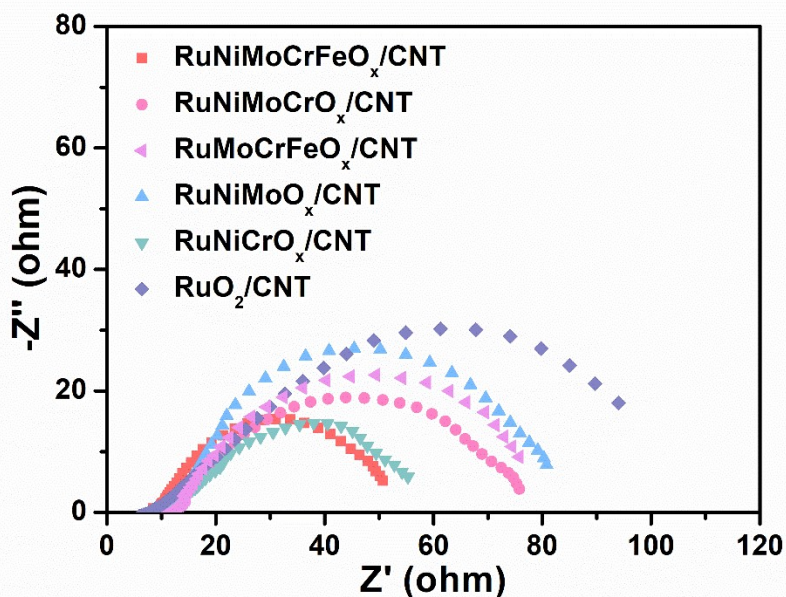

5  
 6 **Figure S28.** EIS Nyquist plots of RuNiMoCrFeO<sub>x</sub>/CNT, RuNiMoCrO<sub>x</sub>/CNT, RuMoCrFeO<sub>x</sub>/CNT,  
 7 RuNiMoO<sub>x</sub>/CNT, RuNiCrO<sub>x</sub>/CNT catalysts.

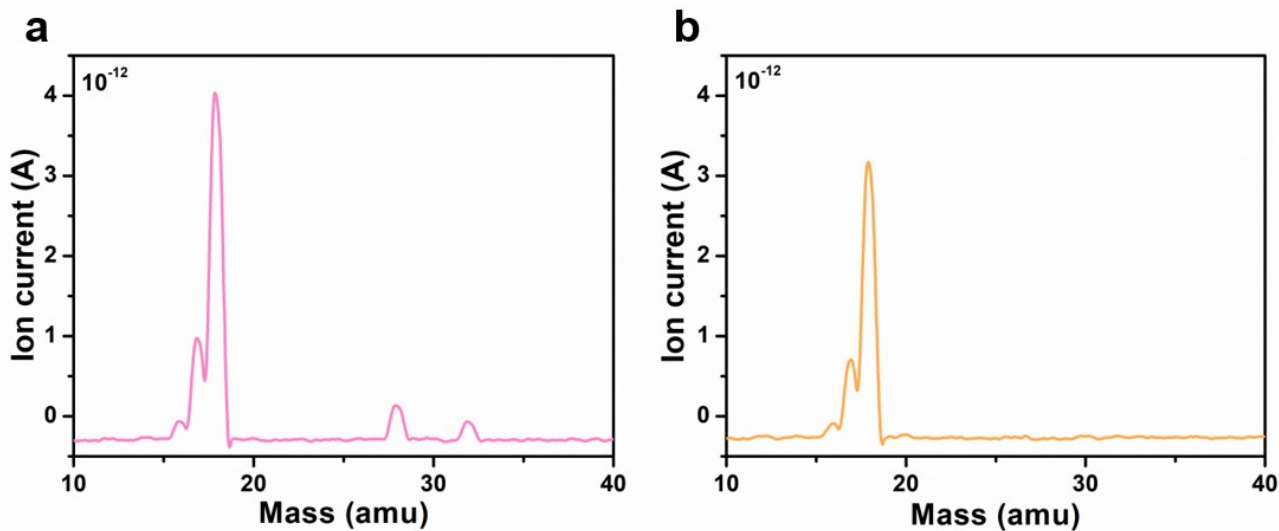

Figure S29. (a) Collected air mass spectrometry and (b) Argon mass spectrometry by DEMS.

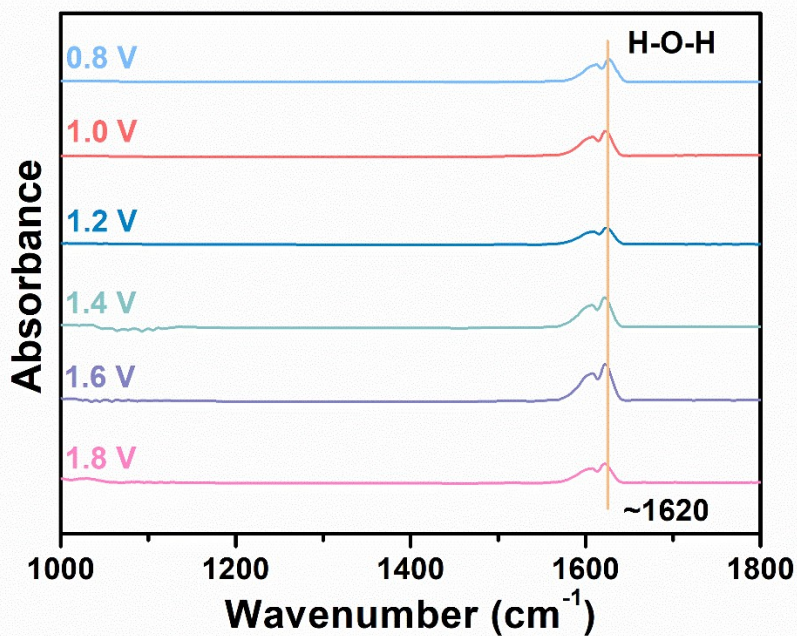

Figure S30. *In situ* FTIR spectra of RuNiMoCrFeO<sub>x</sub>/CNT.

1 **Table S1.** Comparing the catalytic performance of RuNiMoCrFeO<sub>x</sub>/CNT with comparison samples under  
 2 acid OER catalysts.

| Catalysts                     | Overpotential@10mV cm <sup>-2</sup> | Tafel slope (mV dec <sup>-1</sup> ) |
|-------------------------------|-------------------------------------|-------------------------------------|
| RuNiMoCrFeO <sub>x</sub> /CNT | 219                                 | 47                                  |
| RuNiMoCrO <sub>x</sub> /CNT   | 240                                 | 48                                  |
| RuMoCrFeO <sub>x</sub> /CNT   | 253                                 | 50                                  |
| RuNiMoO <sub>x</sub> /CNT     | 280                                 | 61                                  |
| RuNiCrO <sub>x</sub> /CNT     | 271                                 | 60                                  |
| RuO <sub>2</sub> /CNT         | 280                                 | 99                                  |
| Commercial RuO <sub>2</sub>   | 288                                 | 195                                 |

3  
 4 **Table S2.** Comparison of TOF in this study and other recently Ru-based OER electrocatalysts in acidic  
 5 solutions.

| No. | Catalysts                                            | TOF                                  | References       |
|-----|------------------------------------------------------|--------------------------------------|------------------|
| 1   | <b>RuNiMoCrFeO<sub>x</sub>/CNT</b>                   | <b>0.24 s<sup>-1</sup> at 250 mV</b> | <b>This work</b> |
| 2   | <b>RuNiMoCrO<sub>x</sub>/CNT</b>                     | <b>0.21 s<sup>-1</sup> at 250 mV</b> | <b>This work</b> |
| 3   | <b>RuMoCrFeO<sub>x</sub>/CNT</b>                     | <b>0.18 s<sup>-1</sup> at 250 mV</b> | <b>This work</b> |
| 4   | <b>RuNiMoO<sub>x</sub>/CNT</b>                       | <b>0.13 s<sup>-1</sup> at 250 mV</b> | <b>This work</b> |
| 5   | <b>RuNiCrO<sub>x</sub>/CNT</b>                       | <b>0.15 s<sup>-1</sup> at 250 mV</b> | <b>This work</b> |
| 6   | Ho <sub>2</sub> Ru <sub>2</sub> O <sub>7</sub> (HRO) | 0.081 s <sup>-1</sup> at 300 mV      | 1                |
| 7   | Sr–Ru–Ir ternary<br>oxide electrocatalysts           | 0.13 s <sup>-1</sup> at 300 mV       | 2                |
| 8   | Cr <sub>0.6</sub> Ru <sub>0.4</sub> O <sub>2</sub>   | 0.15 s <sup>-1</sup> at 260 mV       | 3                |

|    |                                                                       |                                  |   |
|----|-----------------------------------------------------------------------|----------------------------------|---|
| 9  | Porous $\text{Y}_2[\text{Ru}_{1.6}\text{Y}_{0.4}]\text{O}_{7-\delta}$ | $0.055 \text{ s}^{-1}$ at 270 mV | 4 |
| 10 | Cu-doped $\text{RuO}_2$                                               | $0.053 \text{ s}^{-1}$ at 250 mV | 5 |

1

2 **Table S3.** Summary of recently reported representative Ru-based OER electrocatalysts in acidic solutions.

3

| No. | Catalysts                          | Electrolyte                  | Overpotential<br>at 100 mA<br>$\text{cm}^{-2}$ (mV) | Durability                          | References |
|-----|------------------------------------|------------------------------|-----------------------------------------------------|-------------------------------------|------------|
| 1   | $\text{RuNiMoCrFeO}_x/\text{CC}$   | 0.5M $\text{H}_2\text{SO}_4$ | 261                                                 | 100 h at 100<br>$\text{mA cm}^{-2}$ | This work  |
| 2   | C- $\text{RuO}_2$ -RuSe            | 0.5M $\text{H}_2\text{SO}_4$ | 294                                                 | 50 h at 10<br>$\text{mA cm}^{-2}$   | 6          |
| 3   | Ru/ $\text{RuS}_2$ heterostructure | 0.5M $\text{H}_2\text{SO}_4$ | 319                                                 | 24 h at 10<br>$\text{mA cm}^{-2}$   | 7          |

4

5 **Table S4.** Synthesized compounds used for electrochemical testing.

6

| Catalysts                         | Entropy | Removed element |
|-----------------------------------|---------|-----------------|
| $\text{RuNiMoCrFeO}_x/\text{CNT}$ | 1.61 R  | -               |
| $\text{RuNiMoCrO}_x/\text{CNT}$   | 1.39 R  | Fe              |
| $\text{RuMoCrFeO}_x/\text{CNT}$   | 1.39 R  | Ni              |
| $\text{RuNiMoO}_x/\text{CNT}$     | 1.10 R  | Cr, Fe          |
| $\text{RuNiCrO}_x/\text{CNT}$     | 1.10 R  | Mo, Fe          |

7

8 **Table S5.** Synthesized compounds used for electrochemical testing.

9

| Solution  | Ru | Ni     | Mo         | Cr     | Fe     |
|-----------|----|--------|------------|--------|--------|
| After OER | -  | 0.0038 | 0.011<br>1 | 0.0095 | 0.0086 |

10

11 **References**12 1. J. Yan, J. Zhu, D. Chen, S. Liu, X. Zhang, S. Yu, Z. Zeng, L. Jiang and F. Du, *J. Mater. Chem. A*, 2022,  
13 **10**, 9419-9426.



- 1 2. Y. Wen, P. Chen, L. Wang, S. Li, Z. Wang, J. Abed, X. Mao, Y. Min, C. Dinh, P. Luna, R. Huang, L.  
2 Zhang, L. Wang, L. Wang, R. Nielsen, H. Li, T. Zhuang, C. Ke, O. Voznyy, Y. Hu, Y. Li, W. Goddard, B.  
3 Zhang, H. Peng and E. Sargent, *J. Am. Chem. Soc.*, 2021, **143**, 6482-6490.
- 4 3. Y. Lin, Z. Tian, L. Zhang, J. Ma, Z. Jiang, B. Deibert, R. Ge and L. Chen, *Nat. Commun.*, 2019, **10**, 162.  
5 4. J. Kim, P. Shih, Y. Qin, Z. Al-Bardan, C. Sun and H. Yang, *Angew. Chem. Int. Ed.*, 2018, **57**, 13877-  
6 13881.
- 7 5. J. Su, R. Ge, K. Jiang, Y. Dong, F. Hao, Z. Tian, G. Chen and L. Chen, *Adv. Mater.*, 2018, **30**, 1801351.  
8 6. J. Wang, C. Cheng, Q. Yuan, H. Yang, F. Meng, Q. Zhang, L. Gu, J. Cao, L. Li, S.-C. Haw, Q. Shao, L.  
9 Zhang, T. Cheng, F. Jiao and X. Huang, *Chem*, 2022, **8**, 1673-1687.
- 10 7. J. Zhu, Y. Guo, F. Liu, H. Xu, L. Gong, W. Shi, D. Chen, P. Wang, Y. Yang, C. Zhang, J. Wu, J. Luo  
11 and S. Mu, *Angew. Chem. Int. Ed.*, 2021, **60**, 12328-12334.
